# Supplementary material for: Designing an industrially viable bimetallic catalyst for the polyol synthesis
Source: Royal Society of Chemistry journal article supplement (doi:10.1039/d3nj00044c), 2023-01-01
Supplement: d3nj00044c1.pdf [file d3nj00044c1.pdf]

Electronic Supplementary material (ESI) for New Journal of Chemistry, RSC.

## Electronic Supplementary Information (ESI)

### Designing an industrially viable bimetallic catalyst for the polyol synthesis

Jyoti R. Kadam,<sup>#ab</sup> Tufeil Sartaj Khan<sup>#ab</sup> and Paresh L. Dhepe<sup>\*ab</sup>

<sup>a</sup> Catalysis and Inorganic chemistry division, CSIR-National Chemical Laboratory, Dr. Homi Bhabha Road, Pune 411008, India.

<sup>b</sup> Academy of Scientific and Innovative Research (AcSIR), CSIR-HRDC Campus, Sector 19, Kamlā Nehru Nagar, Ghaziabad, UP, 201002

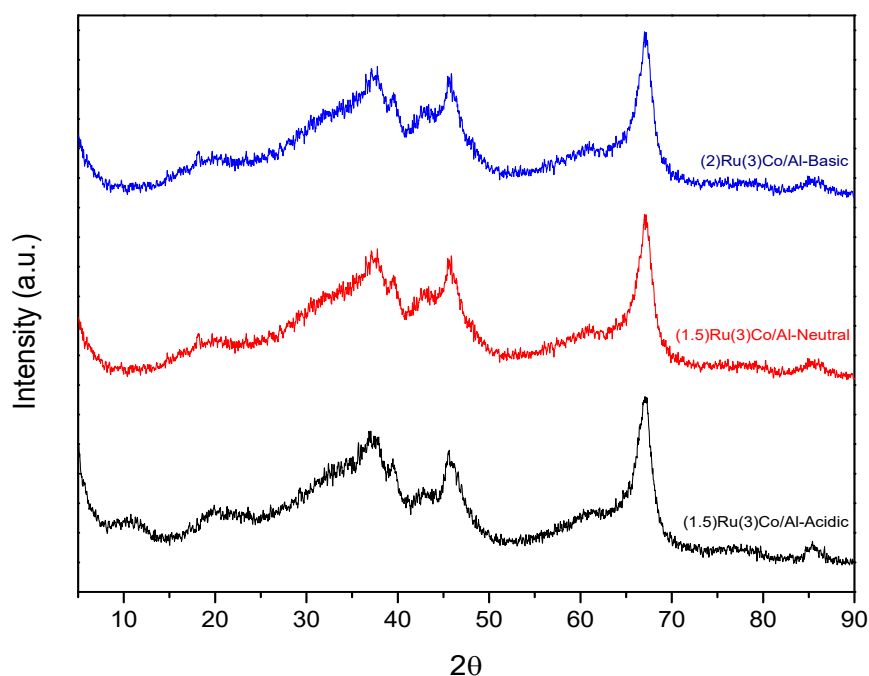

Fig. S1. XRD pattern bimetallic (1.5)Ru(3)Co/Al catalyst with acidic, basic and neutral support.

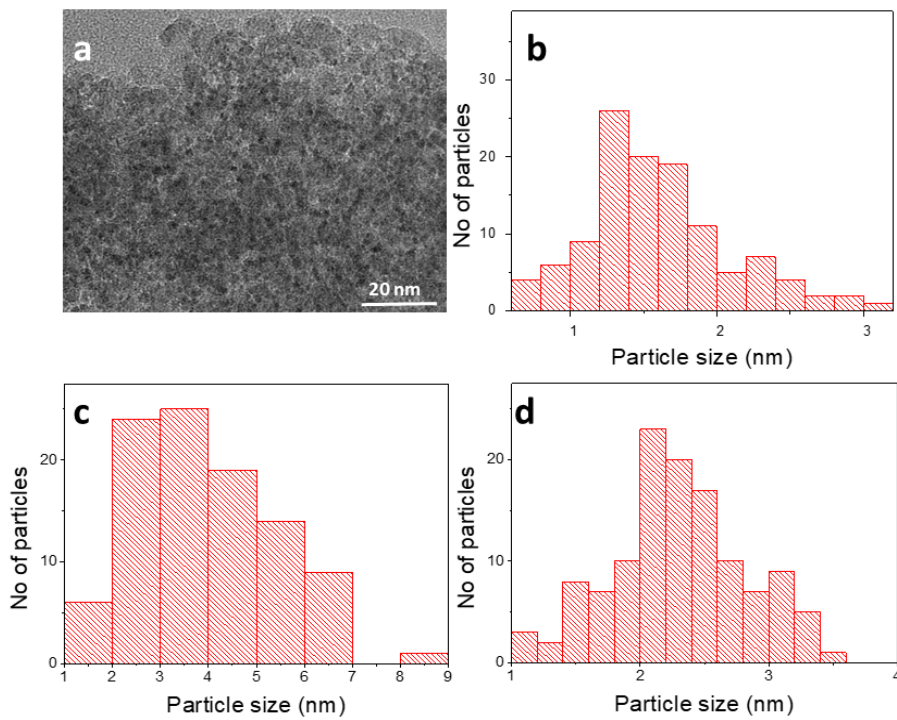

Fig. S2. TEM images (a) (1.5)Ru(3)Co/Al-Basic catalyst Spent, (b) Metal particle size distribution (1.5)Ru(3)Co/Al-Basic catalyst spent, (c & d) Metal particle size distribution (3)Co/Al-Basic catalyst & (1.5)Ru/Al-Basic catalyst.

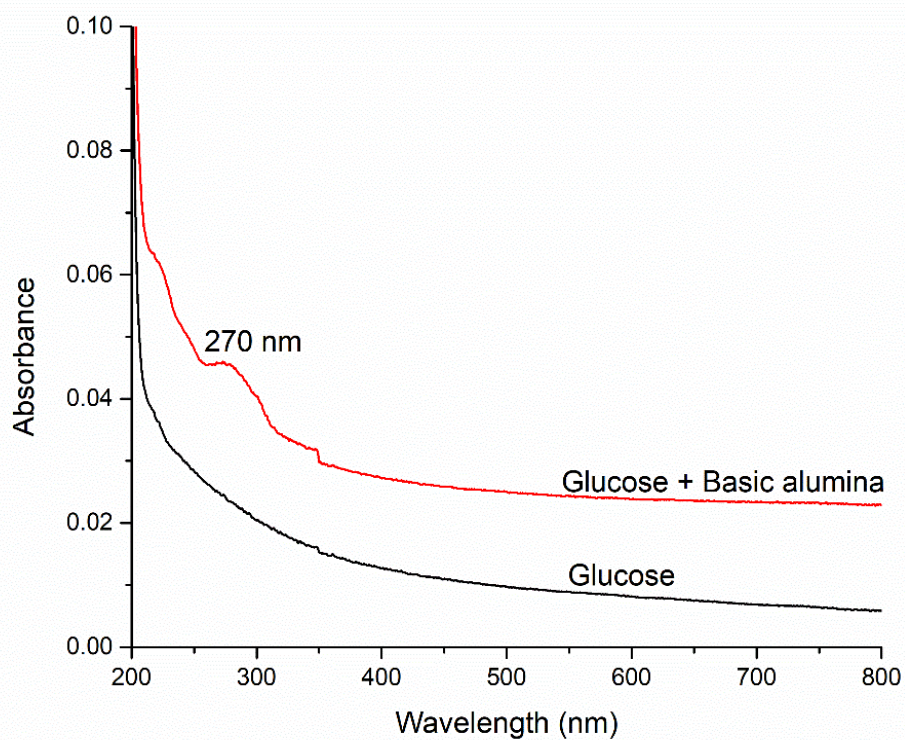

Fig. S3. UV-Vis spectra.

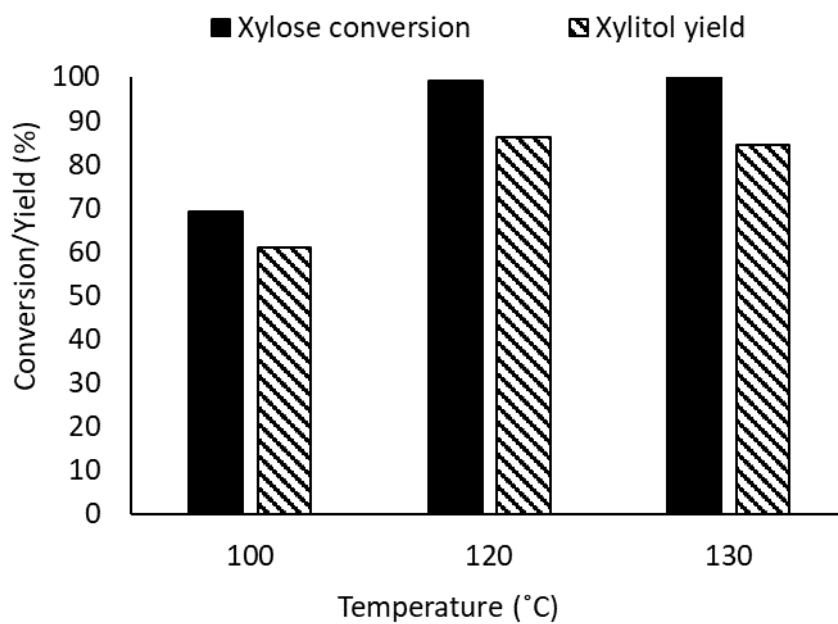

Fig. S4. Effect of temperature for hydrogenation of xylose to xylitol. Reaction conditions: Xylose, (1.5)Ru(3)Co/Al-Basic, S/C (169 mol/mol), Water 35mL, 15 bar H<sub>2</sub> at R.T., 3h.

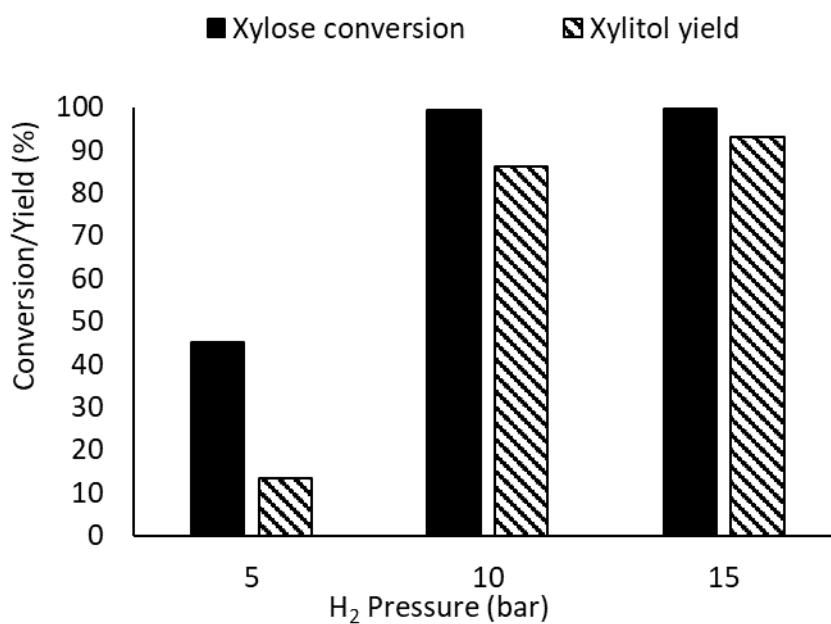

Fig. S5. Effect of time for hydrogenation of xylose to xylitol. Reaction conditions: Xylose, (1.5)Ru(3)Co/Al-Basic, S/C (169 mol/mol), Water 35mL, 120°C, 3h.

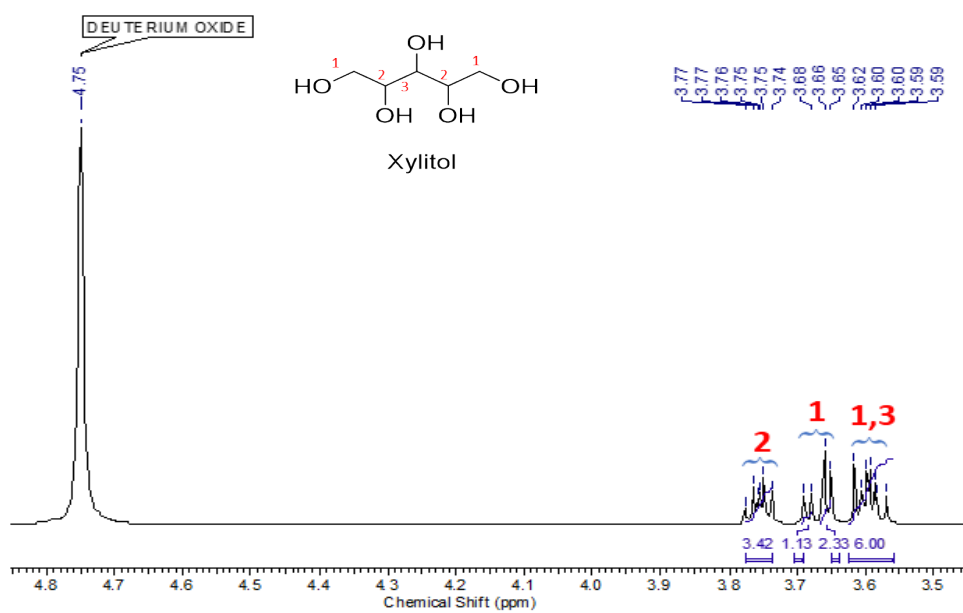

Fig. S6. <sup>1</sup>H NMR of xylitol.

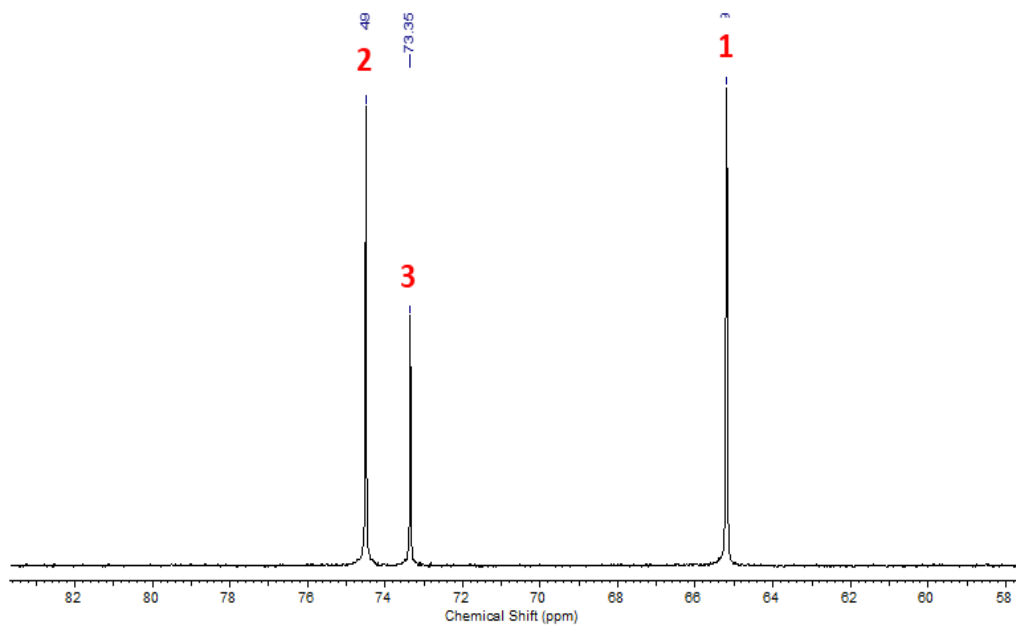

Fig. S7. <sup>13</sup>C NMR of xylitol.

Xy1b #217 RT: 1.26 AV: 1 NL: 1.59E7  
T: FTMS + p ESI Full ms [100.0000-1500.0000]

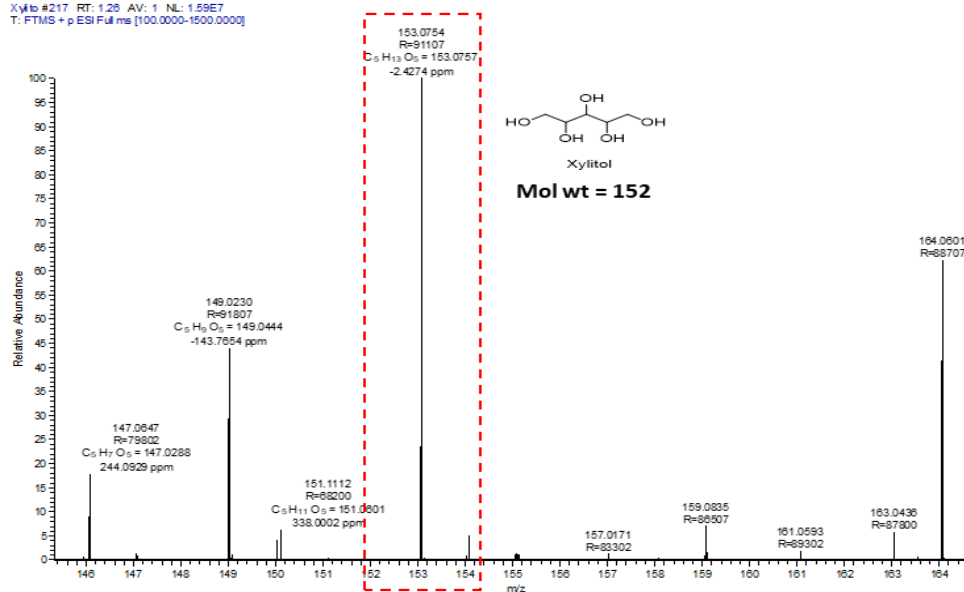

Fig. S8. HRMS analysis of xylitol.
